# Supplementary figures and images for: In silico analysis of sequenced strains of Clostridium difficile reveals a related set of conjugative transposons carrying a variety of accessory genes
Source: PubMed Central journal article supplement — Mob Genet Elements. 2012 Jan 1;2(1):8–12. doi: 10.4161/mge.19297 (PMC3383454; doi:10.4161/mge.19297), 2012-01-01

Figure S1

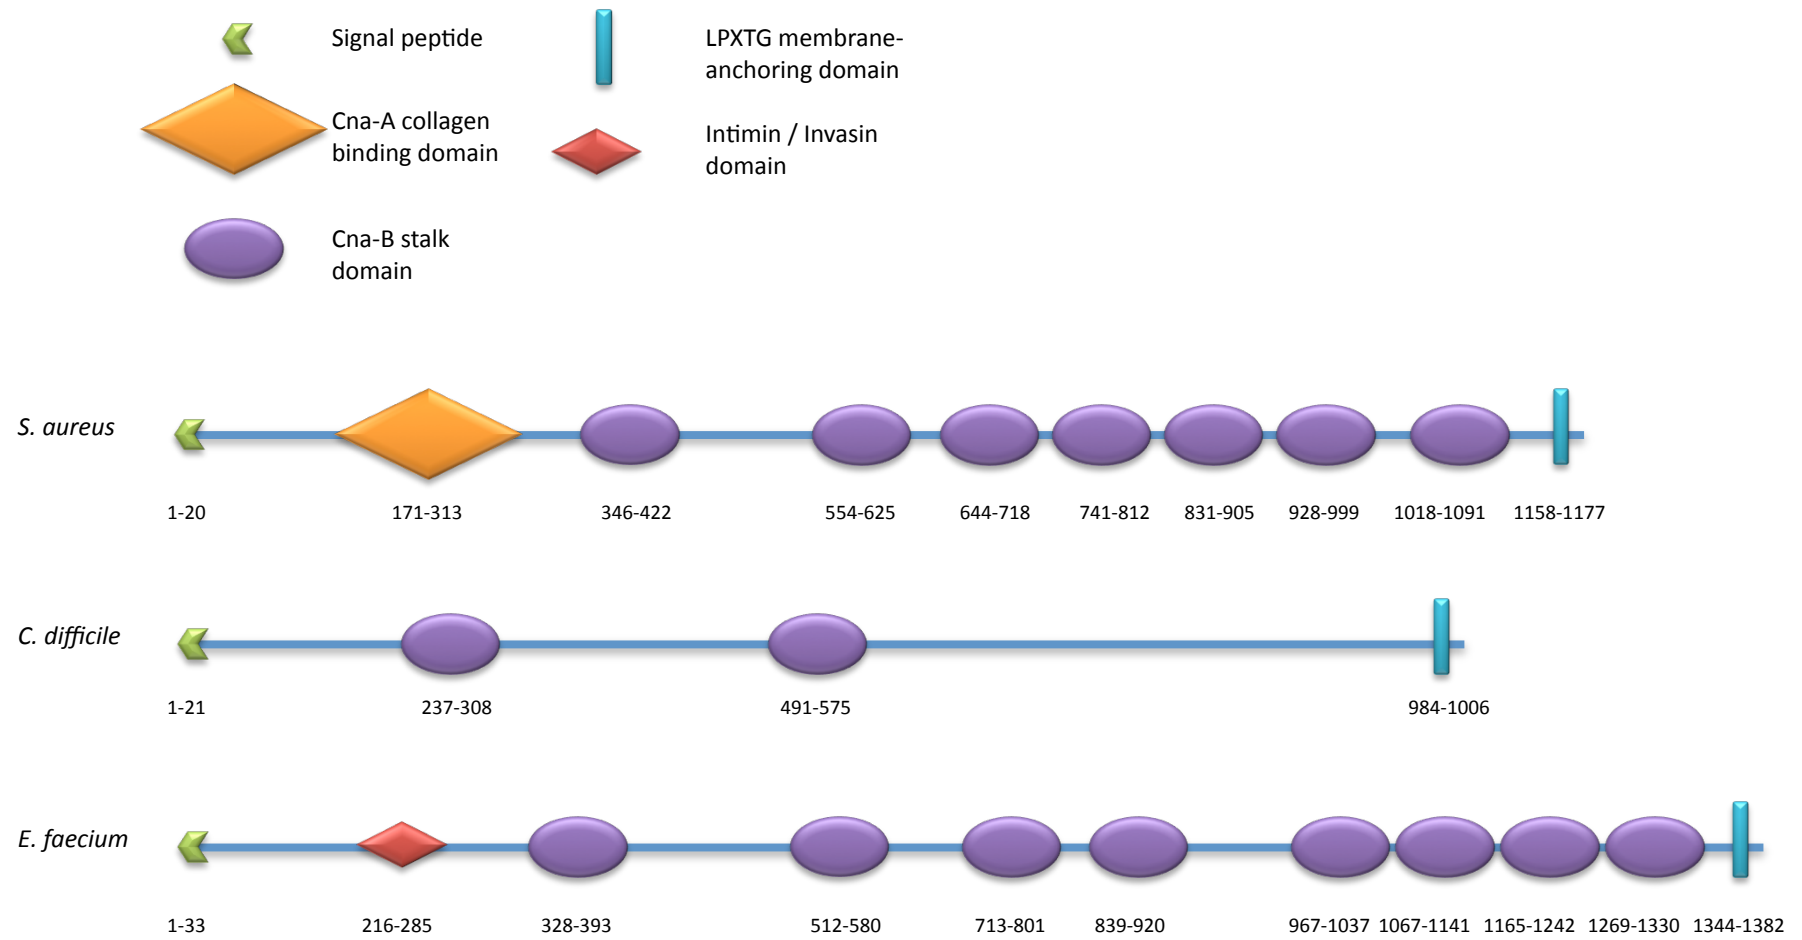

Supplement: mge-2-8-s01.pdf [file mge-2-8-s01.pdf]
